# Supplementary material
Source: ML conference proceedings conference paper supplement (https://openreview.net/forum?id=ifJFKbSZxS)

# Multiple Knapsack

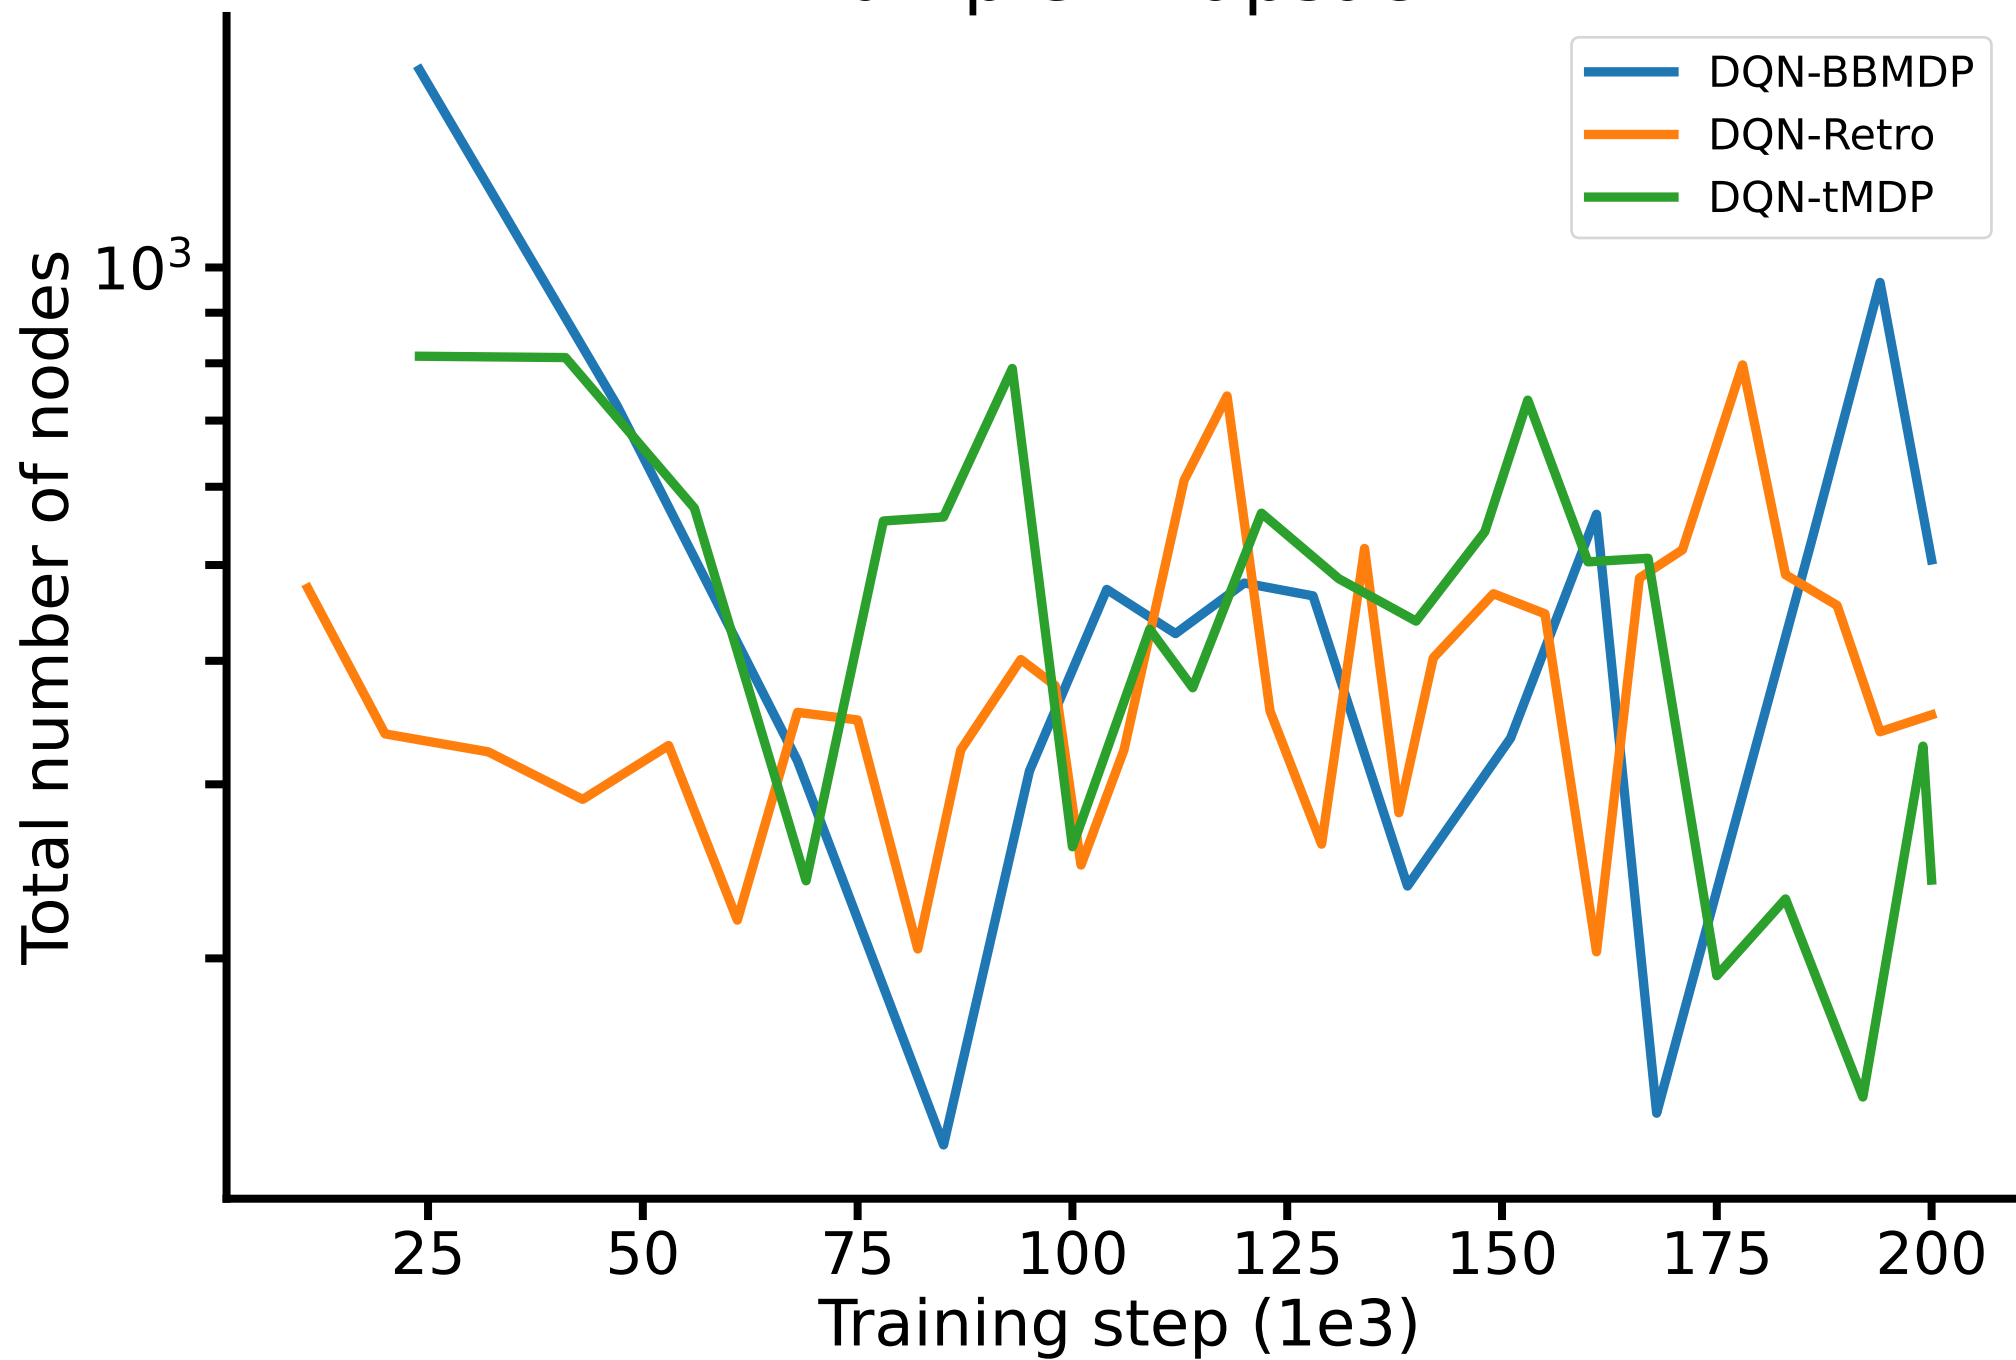

Supplement: supplementary_material [file attachment]

# Set Covering

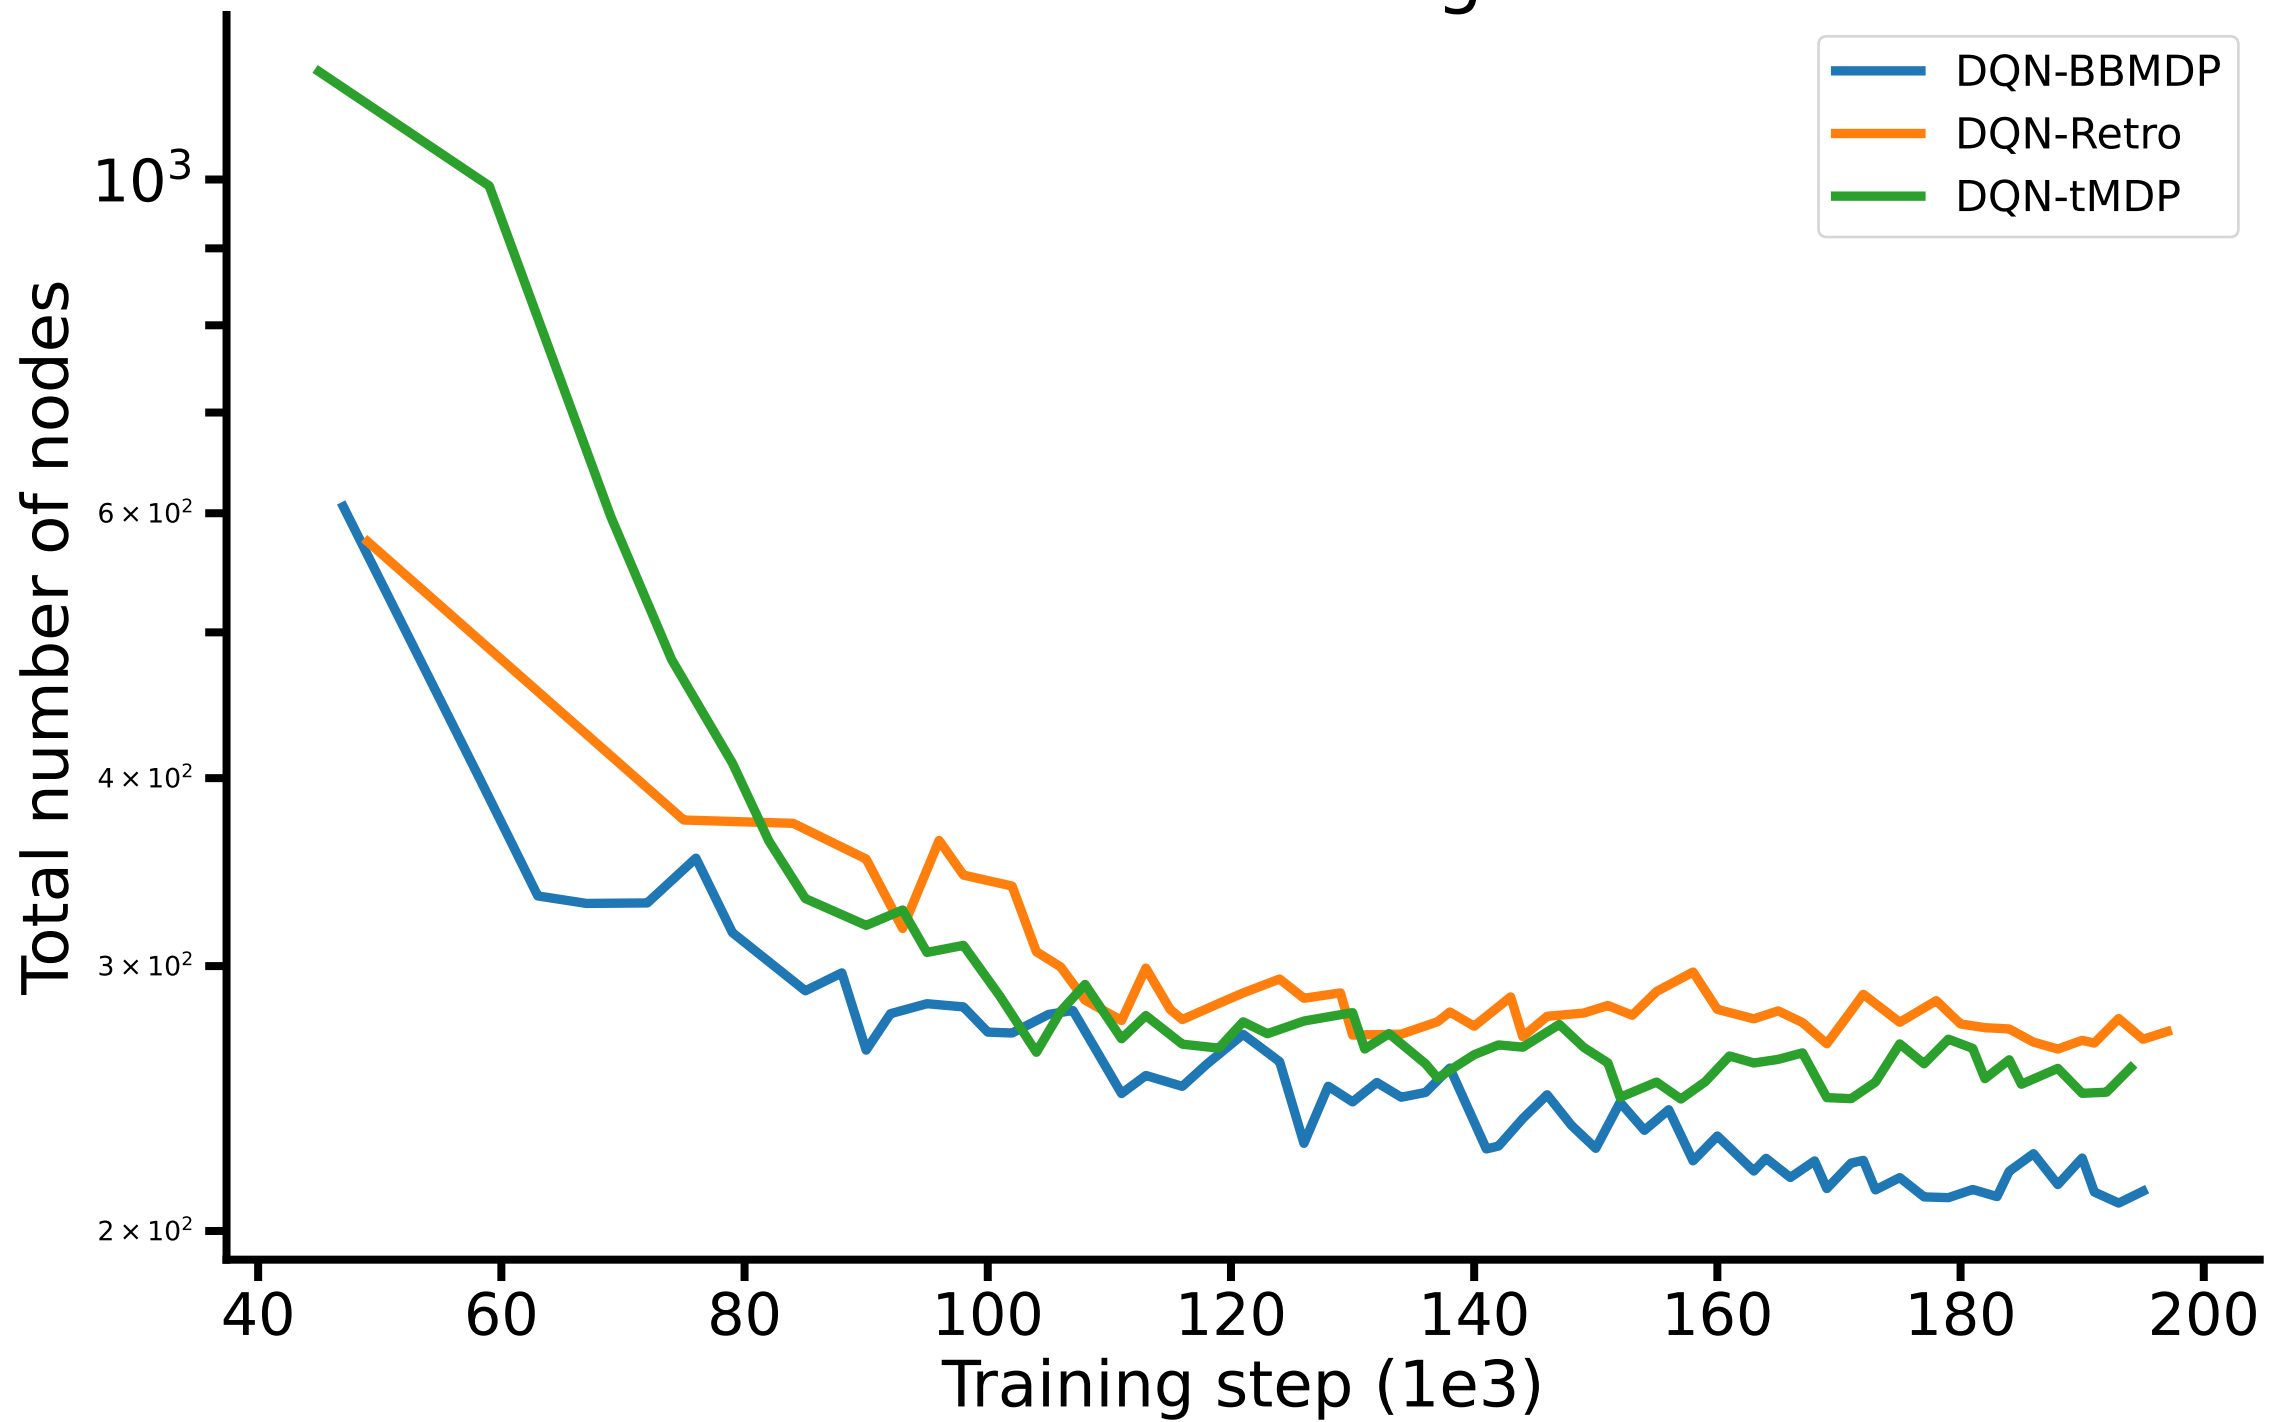

Supplement: supplementary_material [file attachment]

# Combinatorial Auction

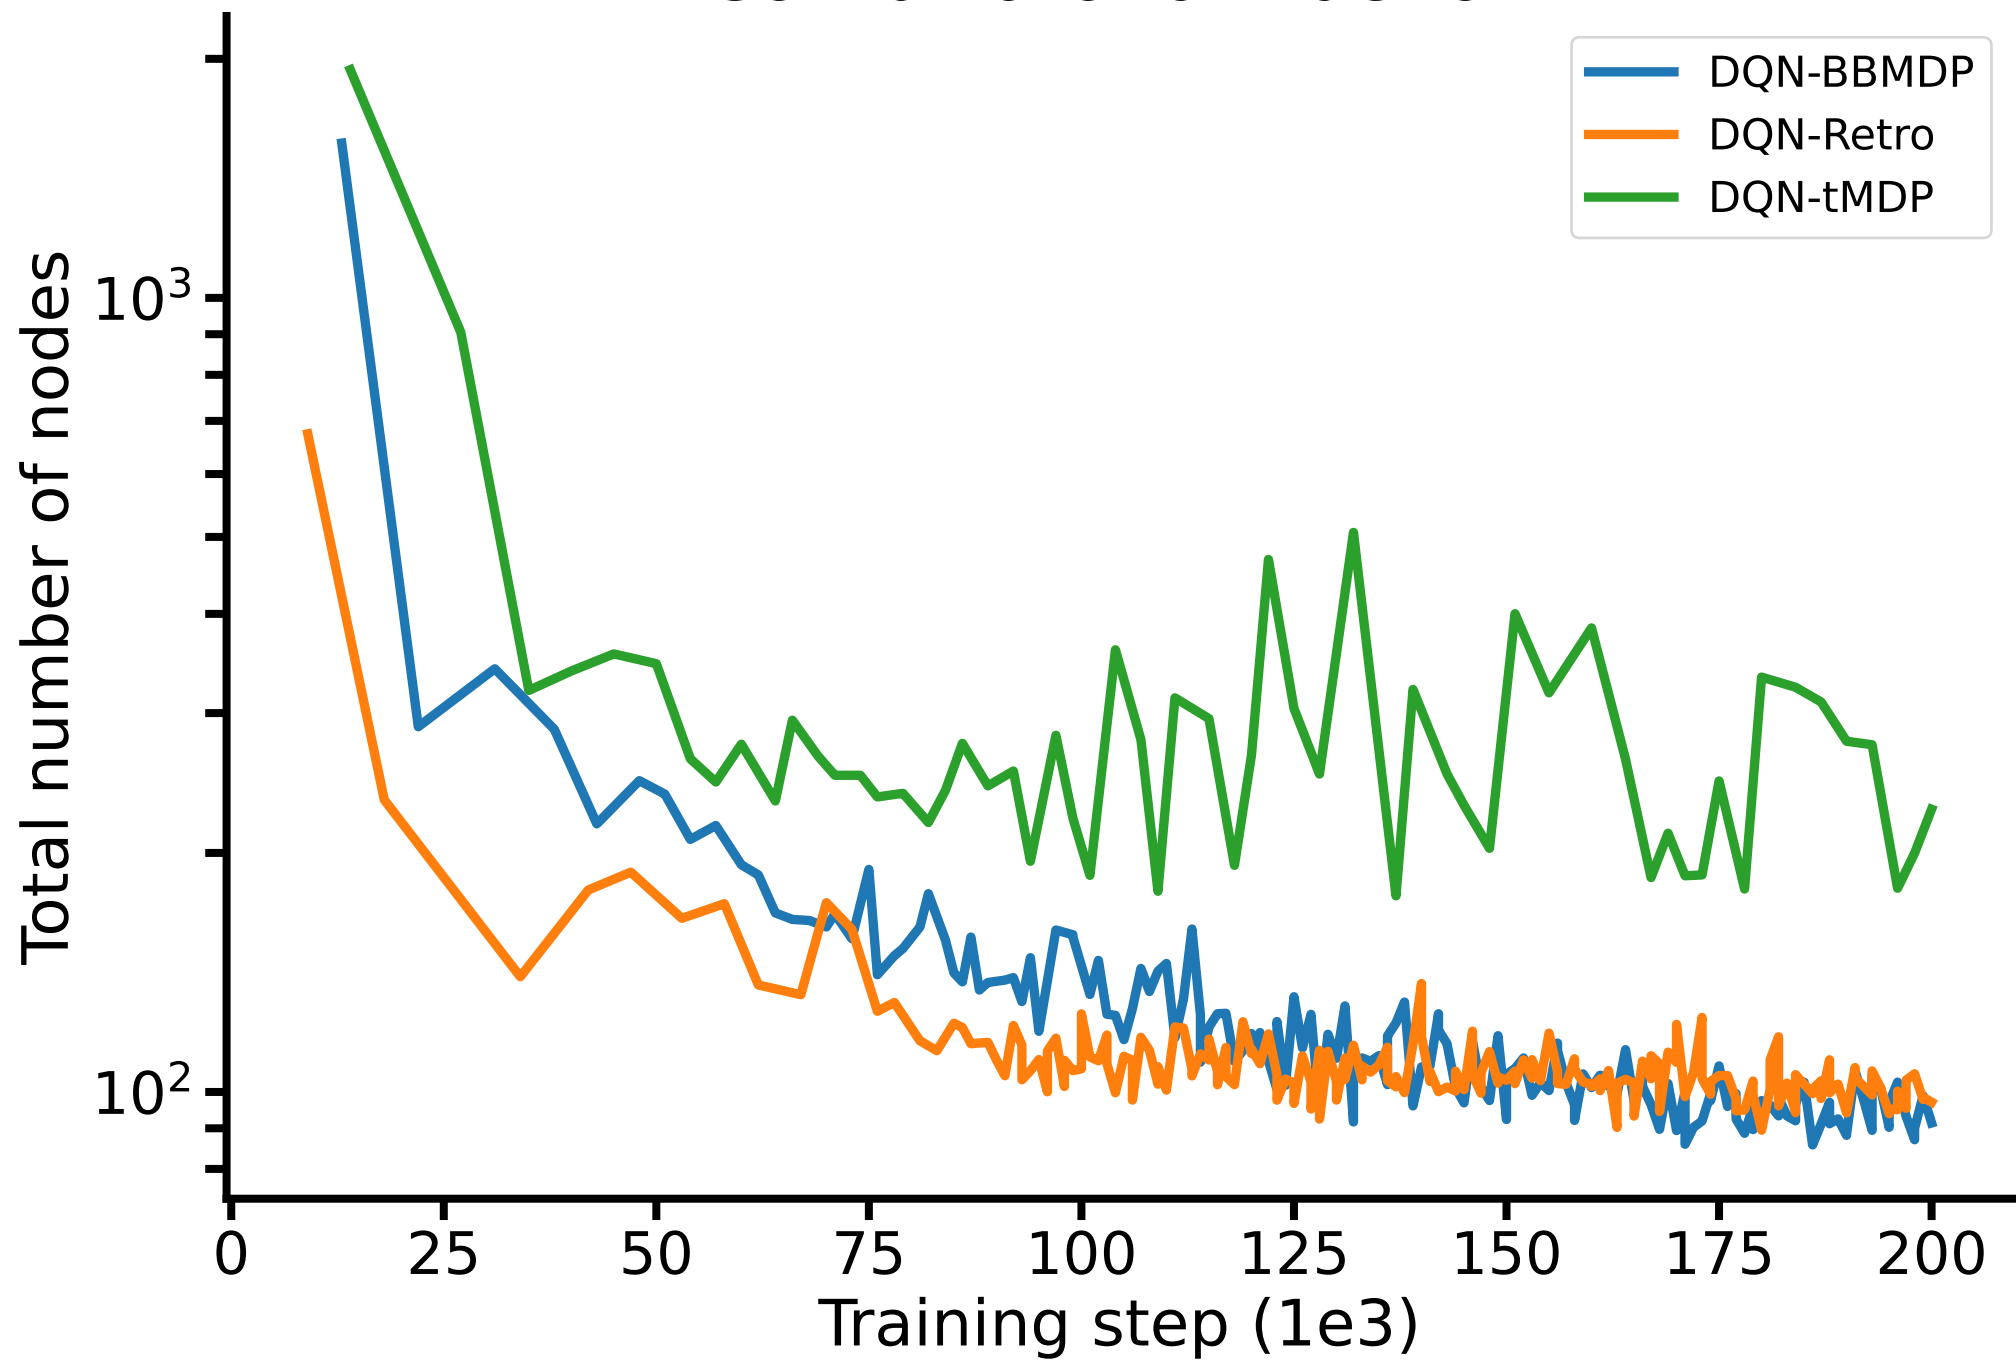

Supplement: supplementary_material [file attachment]

# Maximum Independent Set

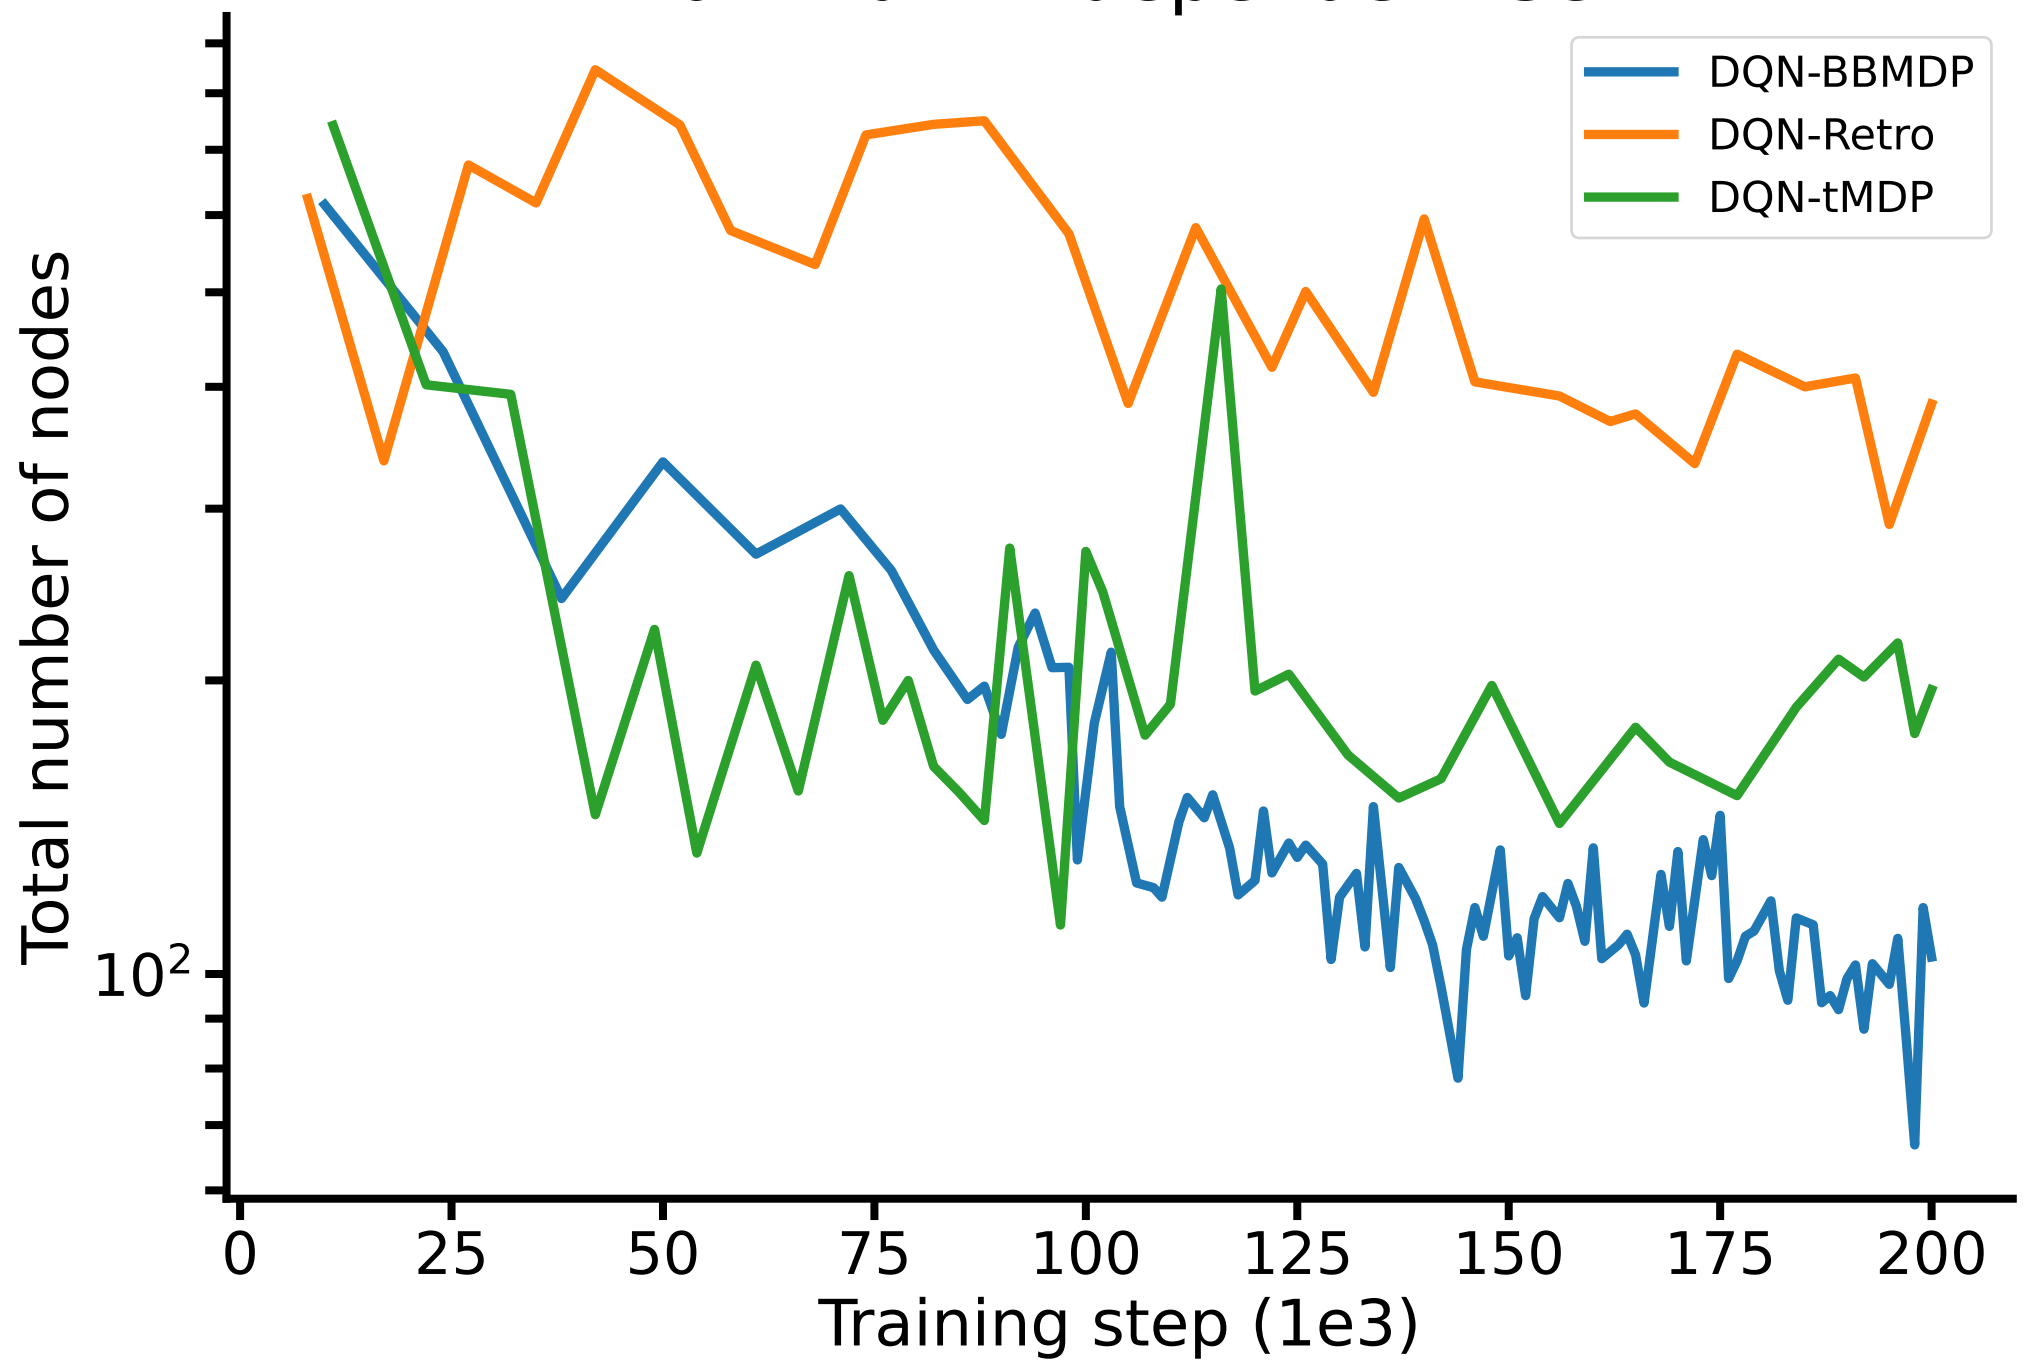

Supplement: supplementary_material [file attachment]

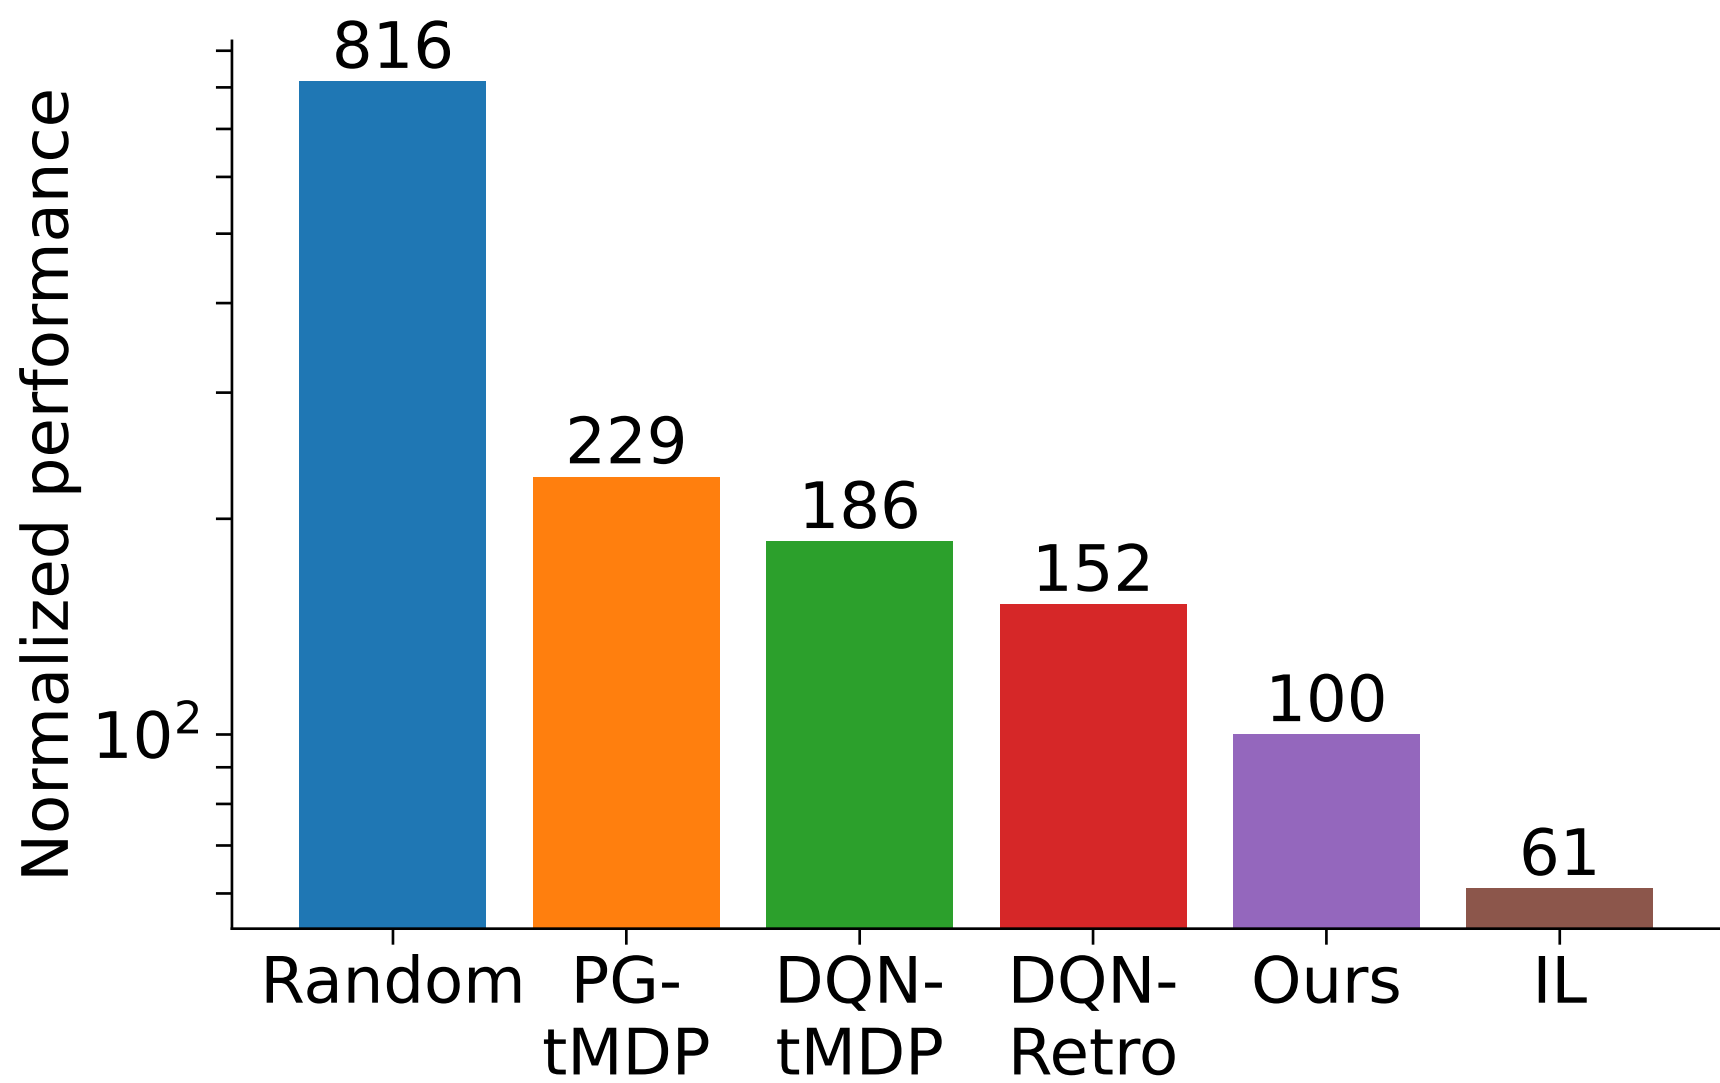

Supplement: supplementary_material [file attachment]
